# Supplementary material for: Effect of wavelength and liquid on formation of Ag, Au, Ag/Au nanoparticles via picosecond laser ablation and SERS-based detection of DMMP
Source: publisher site journal article supplement (doi:10.3762/bjnano.15.86), 2024-08-19
Supplement: Additional file 1 [file 2190-4286-15-86-S1.pdf]

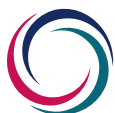

## Supporting Information

for

### **Effect of wavelength and liquid on formation of Ag, Au, Ag/Au nanoparticles via picosecond laser ablation and SERS-based detection of DMMP**

Sree Satya Bharati Moram, Chandu Byram and Venugopal Rao Soma

*Beilstein J. Nanotechnol.* **2024**, *15*, 1054–1069. [doi:10.3762/bjnano.15.86](https://doi.org/10.3762/bjnano.15.86)

## Additional figures and tables

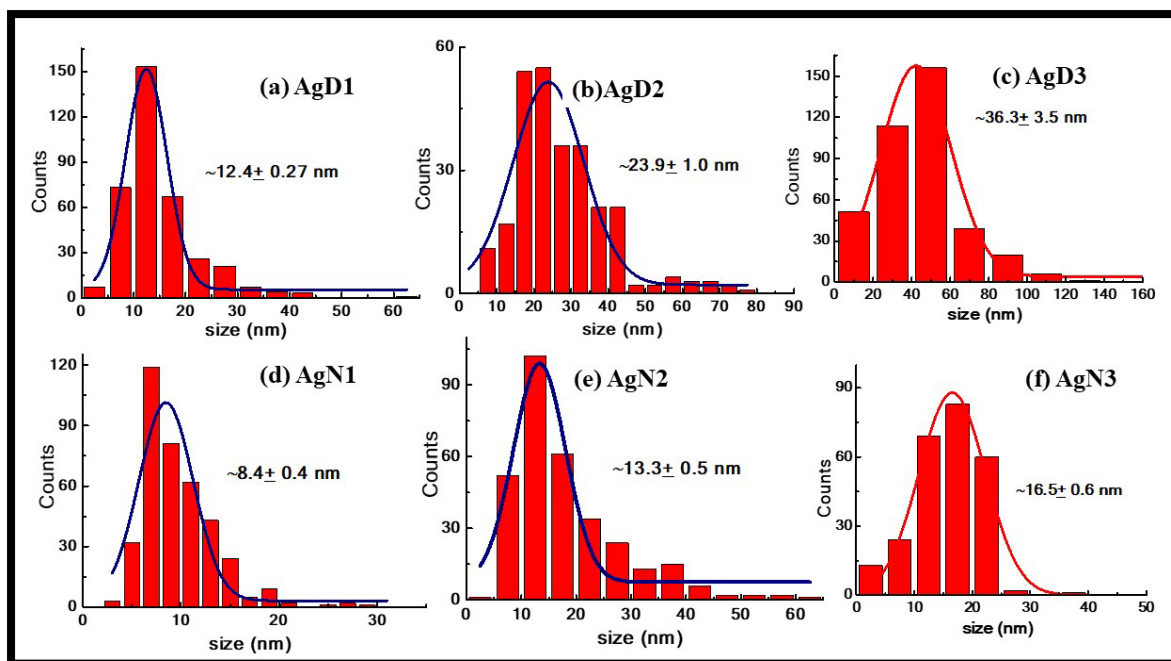

**Figure S1:** Size distribution histogram plots of Ag NPs [(a) AgD1, (b) AgD2, (c) AgD3, (d) AgN1, (e) AgN2, and (f) AgN3].

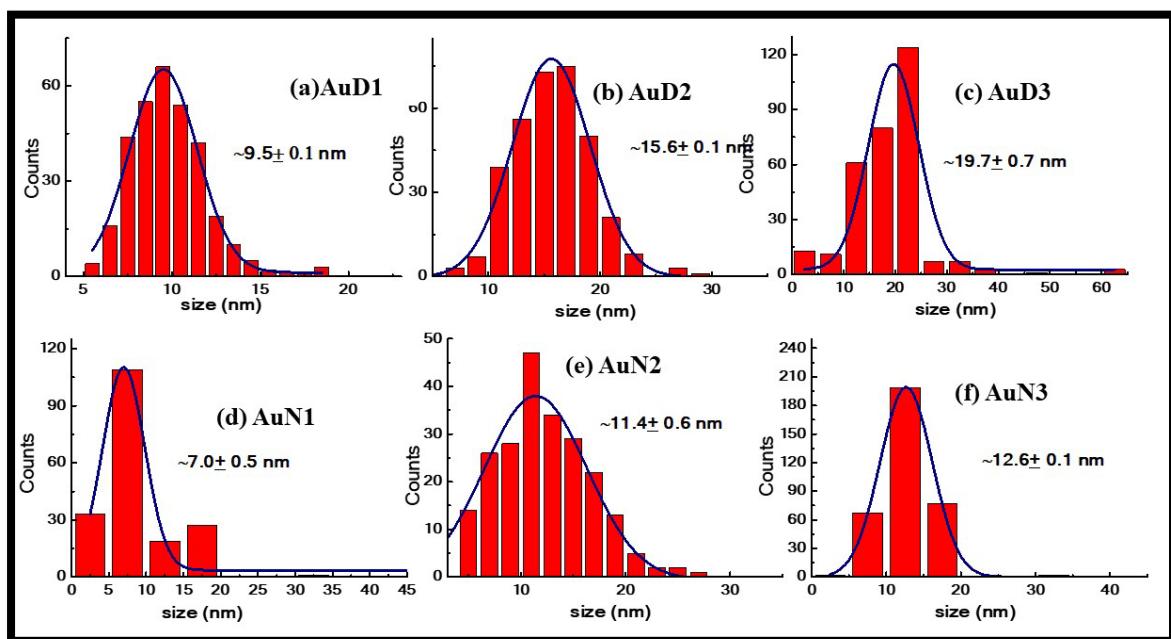

**Figure S2:** Size distribution histogram plots of Au NPs [(a) AuD1, (b) AuD2, (c) AuD3, (d) AuN1, (e) AuN2, and (f) AuN3].

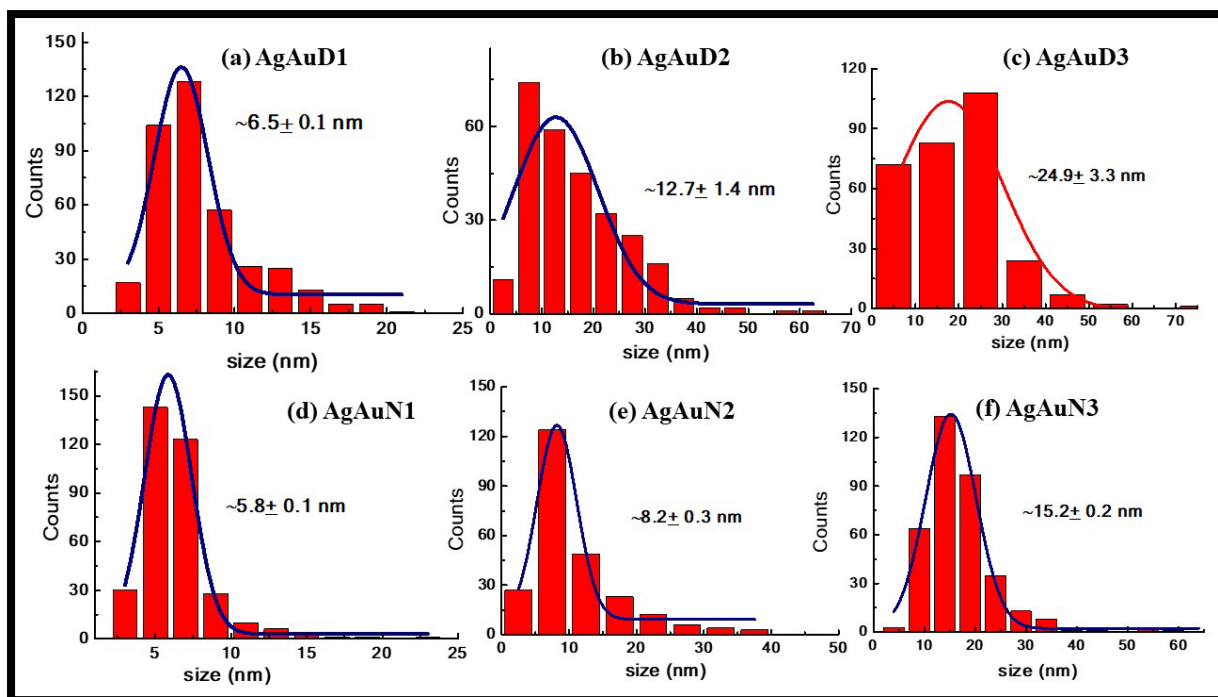

**Figure S3:** Size distribution histogram plots of AgAu NPs [(a) AgAuD1, (b) AgAuD2, (c) AgAuD3, (d) AgAuN1, (e) AgAuN2, and (f) AgAuN3].

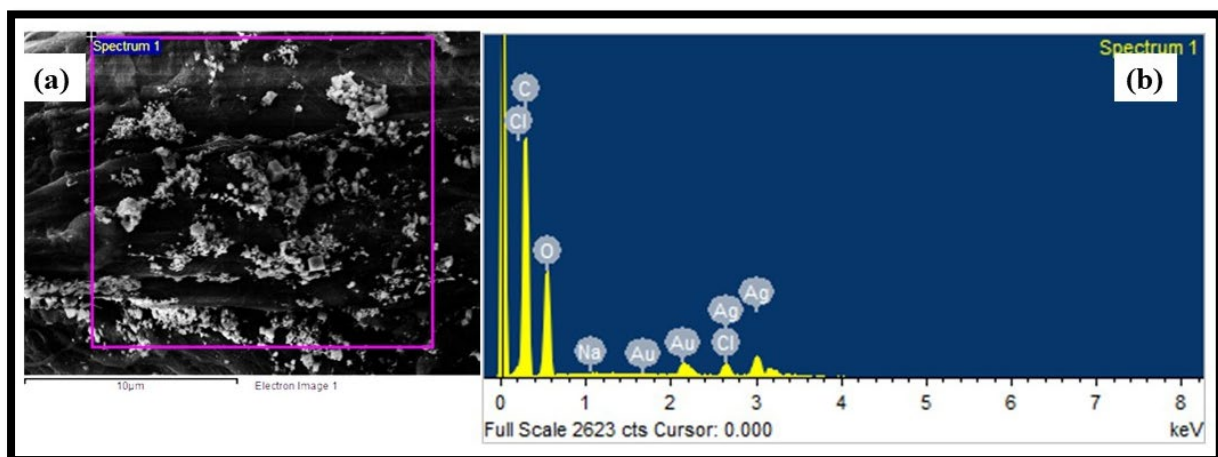

**Figure S4:** FP with (a) AgAuN3 and the corresponding (b) EDX spectra.

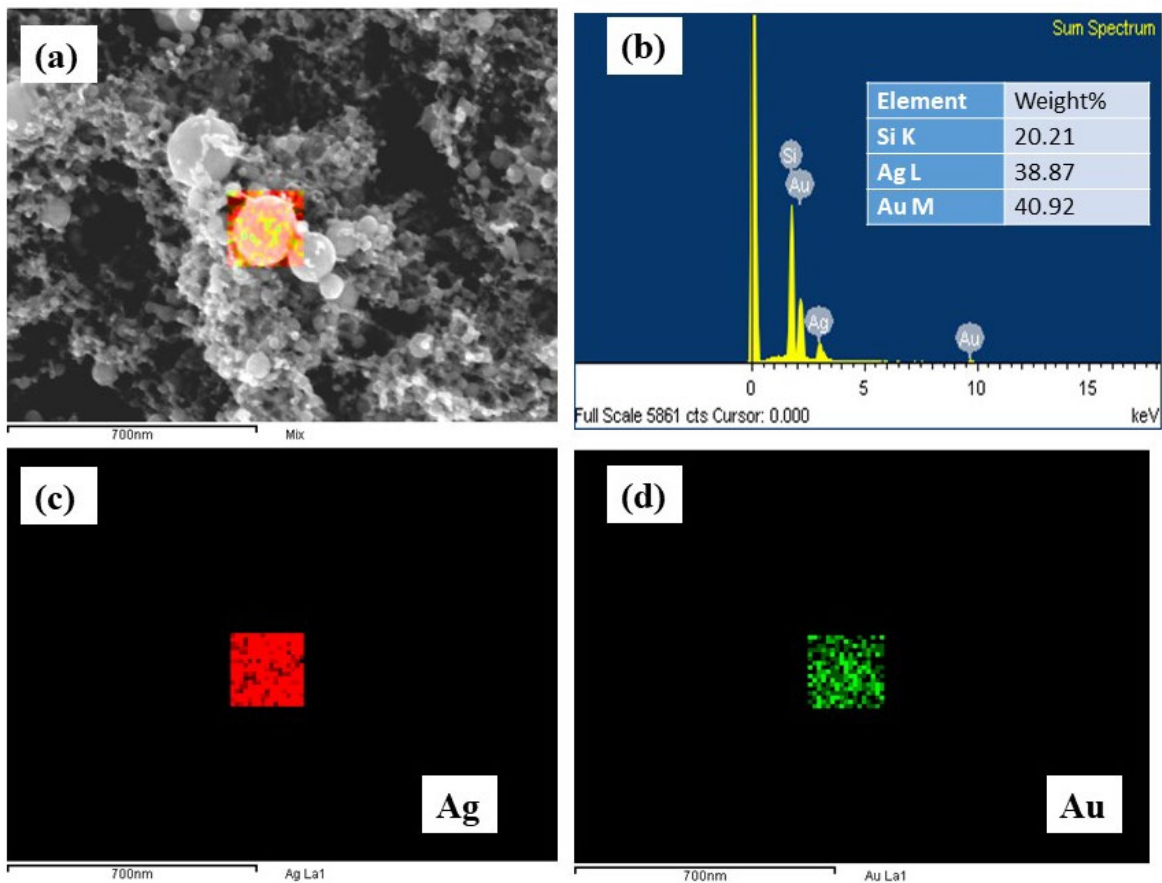

**Figure S5:** (a) FESEM–DES mapping image of AgAuD3 NPs on SI (b) EDX spectra (inset wt%) (c) Ag (d) Au.

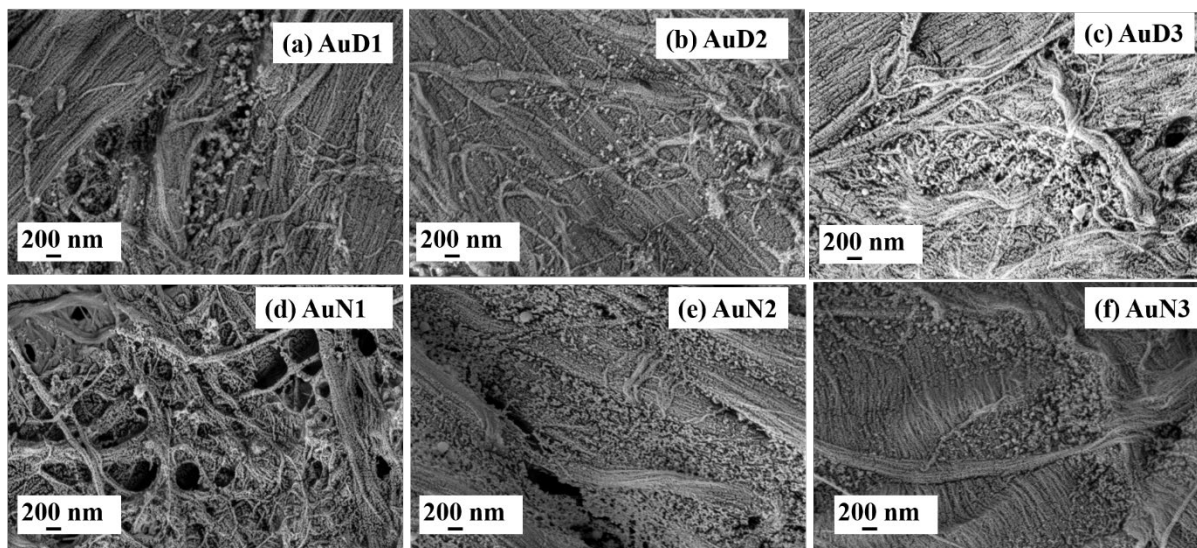

**Figure S6:** FESEM images of the filter paper loaded with Au NPs obtained in (a)–(c) DW and (d)–(f) NaCl.

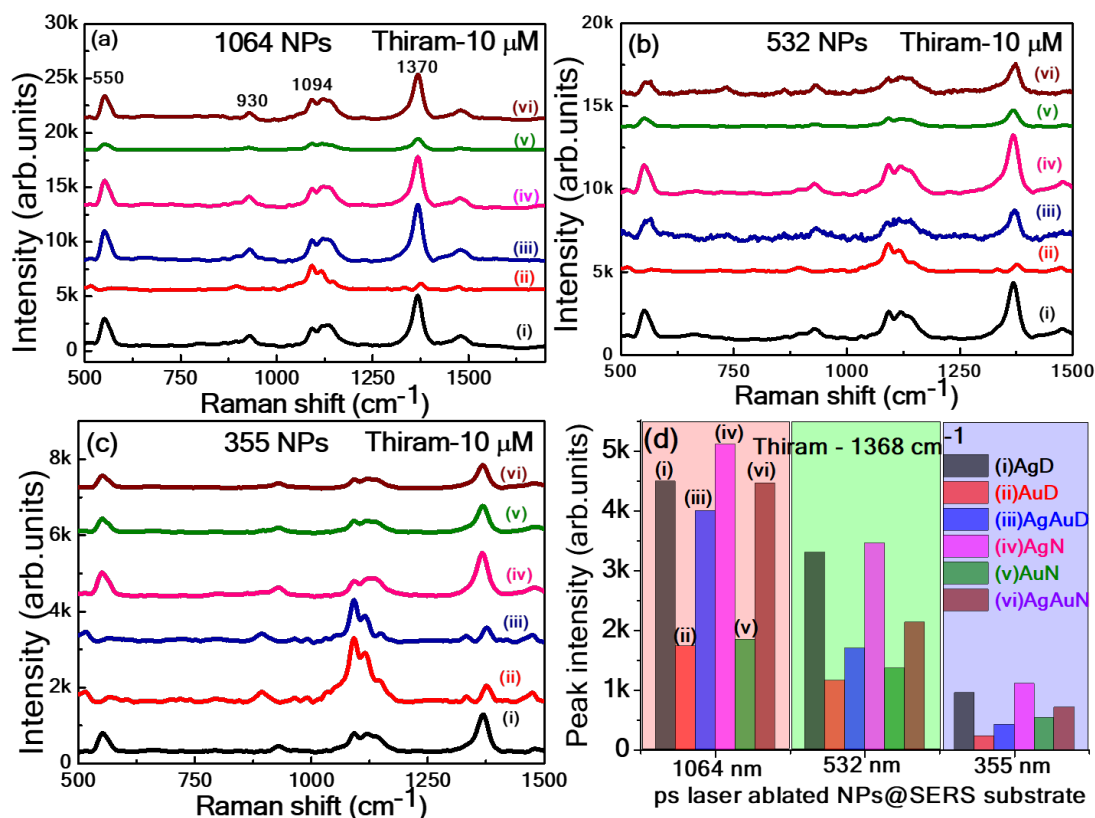

**Figure S7:** SERS spectra of thiram (10 μM) using filter paper loaded with ps laser-ablated AgD, AuD, AgAuD, AgAuN, AuD, and AuN NPs at (a) 1064, (b) 532, and (c) 355 nm. (d) Prominent peak (1368 cm<sup>-1</sup>) intensity histogram.

**Table S8: MS Raman peak and their assignments [1]**

Methyl salicylate (MS): C<sub>8</sub>H<sub>8</sub>O<sub>3</sub>

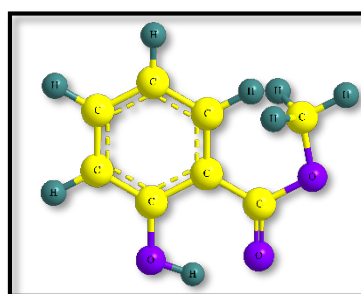

| S. No. | Peak position | Assignment                                  |
|--------|---------------|---------------------------------------------|
| 1      | 562           | Out-of-plane of the benzene ring            |
| 2      | 661           | Out-of-plane and in-plane of a benzene ring |
| 3      | 808           | Stretching vibration of C–H                 |
| 4      | 1033          | In-plane of a benzene ring                  |
| 5      | 1250          | Stretching vibration of C–O                 |

**Table S9: DMMP Raman peak and their assignments [2]**

Dimethyl methylphosphonate (DMMP):  $C_3H_9O_3P$

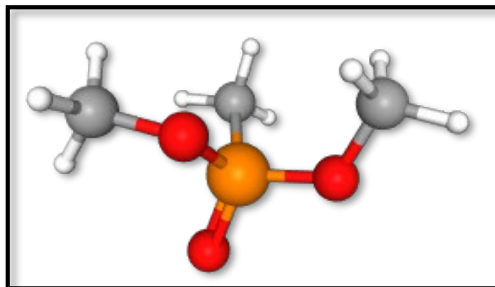

| S. No. | Raman Peak position | Assignment                                                                  |
|--------|---------------------|-----------------------------------------------------------------------------|
| 1      | 714 (strong)        | Stretching P-CH <sub>3</sub> + stretching P-O + bending P-O-CH <sub>3</sub> |
| 2      | 794                 | Asymmetric stretching O-P-O                                                 |
| 3      | 825                 | Stretching P-CH <sub>3</sub>                                                |
| 4      | 1028                | Stretching O-CH <sub>3</sub> + asymmetric stretching (O-P-O)                |
| 5      | 1057                | Stretching O-CH <sub>3</sub> + stretching (O-P-O)                           |

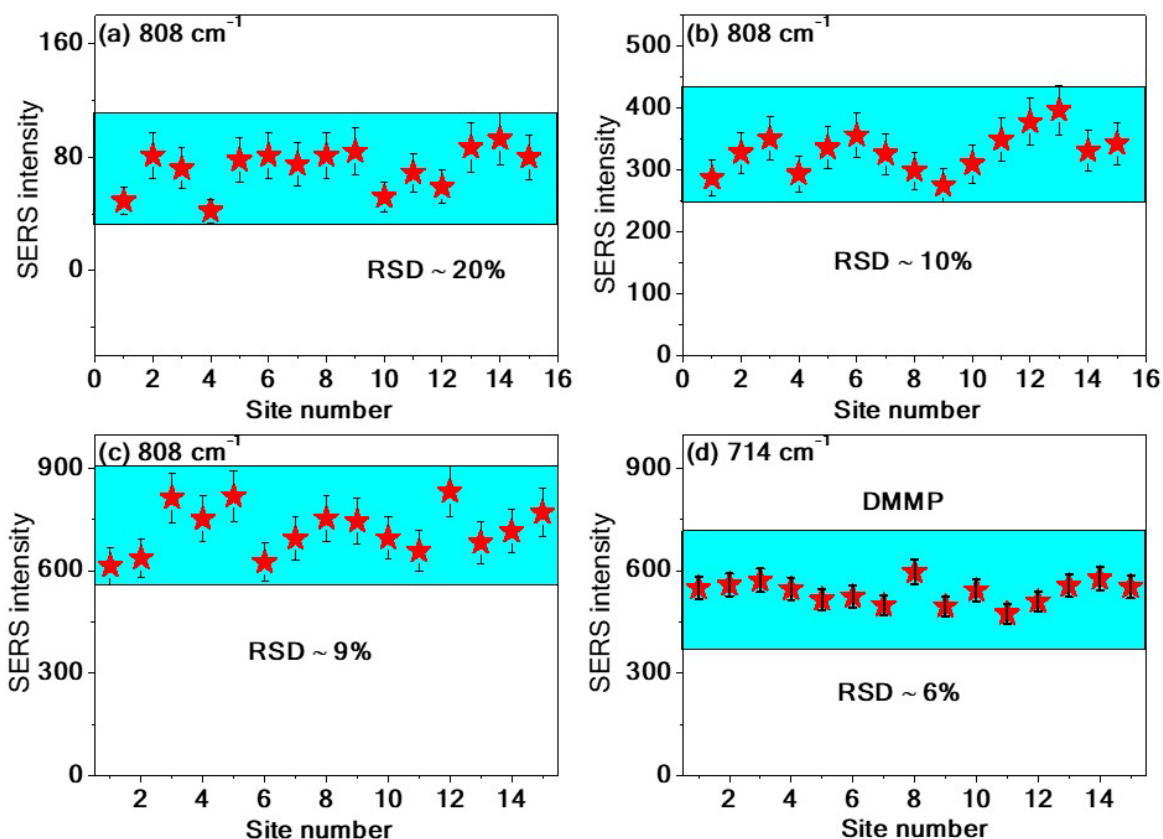

**Figure S10:** Reproducibility data of SERS MS (1 mM) at the following Raman excitations: (a) 632, (b) 532, and (c) 325 nm. (d) Reproducibility data of SERS DMMP (500  $\mu\text{M}$ ) at Raman excitations of 325 nm.

#### Reference:

- (1) Li, Y.; Li, Q.; Wang, Y.; Oh, J.; Jin, S.; Park, Y.; Zhou, T.; Zhao, B.; Ruan, W.; Jung, Y. M. A reagent-assisted method in SERS detection of methyl salicylate. *Spectrochimica Acta Part A: Molecular and Biomolecular Spectroscopy* **2018**, *195*, 172-175. DOI: <https://doi.org/10.1016/j.saa.2018.01.073>.
- (2) Costa, J. C. S.; Ando, R. A.; Sant'Ana, A. C.; Corio, P. Surface-enhanced Raman spectroscopy studies of organophosphorous model molecules and pesticides. *Physical Chemistry Chemical Physics* **2012**, *14* (45), 15645-15651, 10.1039/C2CP42496G. DOI: 10.1039/C2CP42496G.
